# Supplementary material for: Direct Electron Transfer of Glucose Oxidase on Pre-Anodized Paper/Carbon Electrodes Modified through Zero-Length Cross-Linkers for Glucose Biosensors
Source: MDPI journal article supplement (doi:10.3390/bios13050566), 2023-05-22
Supplement: s1 [file s1]

# **Direct Electron Transfer of Glucose Oxidase on Pre-Anodized Paper/Carbon Electrodes Modified through Zero-Length Cross-Linkers for Glucose Biosensors**

**Gilberto Henao-Pabon <sup>1,†</sup>, Ning Gao <sup>2,†</sup>, K. Sudhakara Prasad <sup>3,4,†</sup> and XiuJun Li <sup>1,3,5,\*</sup>**

<sup>1</sup> Biomedical Engineering, University of Texas at El Paso, 500 W University Ave, El Paso, TX 79968, USA

<sup>2</sup> Independent Researcher, 206 via Morella, Encinitas, CA 92024, USA

<sup>3</sup> Department of Chemistry & Biochemistry, University of Texas at El Paso, 500 W University Ave, El Paso, TX 79968, USA

<sup>4</sup> Yenepoya Research Centre, Yenepoya University, Mangalore 575018, Karnataka, India

<sup>5</sup> Forensic Science & Environmental Science and Engineering, 500 W University Ave, El Paso, TX 79968, USA

\* Correspondence: xli4@utep.edu

† These authors contributed equally to this work.

## Measurement of spiked human whole blood samples

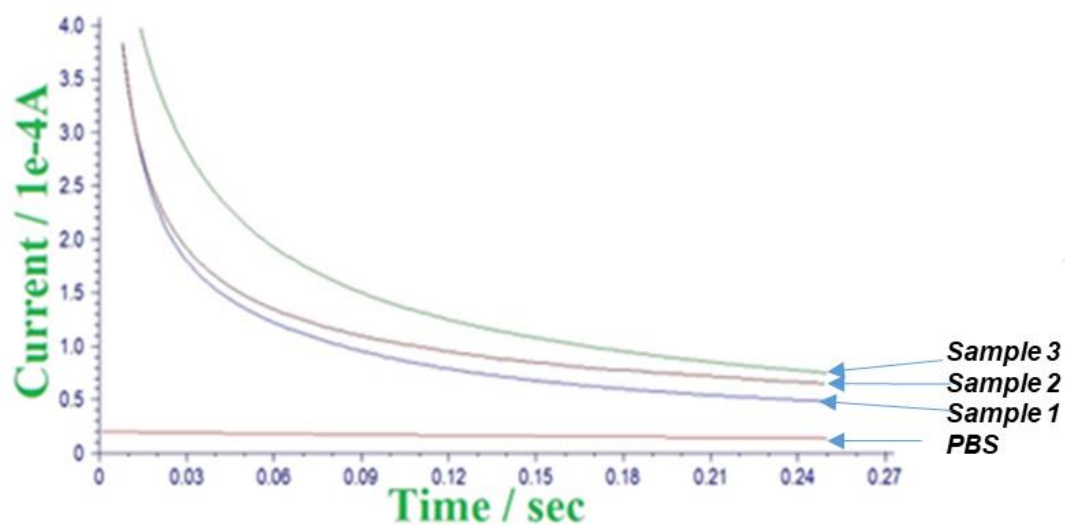

**Figure S1.** Measurement of human whole blood samples using the paper-based glucose biosensor via direct electron transfer.

**Table S1.** Glucose measurement results of human whole blood samples (mM).

| Glucose      | Mean   | Mean± Std. Dev. | Std. Error |
|--------------|--------|-----------------|------------|
| Sample No. 1 | 5.9533 | 5.9533± 0.1721  | 0.0994     |
| Sample No. 2 | 7.8353 | 7.8353± 0.1780  | 0.1028     |
| Sample No. 3 | 9.05   | 9.050± 0.1651   | 0.0953     |
|              |        |                 |            |
|              |        |                 |            |
